# Supplementary material for: Bone marrow involvement identifies a subgroup of advanced Ewing sarcoma patients with fatal outcome irrespective of therapy in contrast to curable patients with multiple bone metastases but unaffected marrow
Source: PubMed Central journal article supplement (PMC5342601; doi:10.18632/oncotarget.10938), 2016-07-29
Supplement: oncotarget-07-70959-s001.pdf [file oncotarget-07-70959-s001.pdf]

**Bone marrow involvement identifies a subgroup of advanced Ewing sarcoma patients with fatal outcome irrespective of therapy in contrast to curable patients with multiple bone metastases but unaffected marrow**

**SUPPLEMENTARY FIGURE AND TABLES**

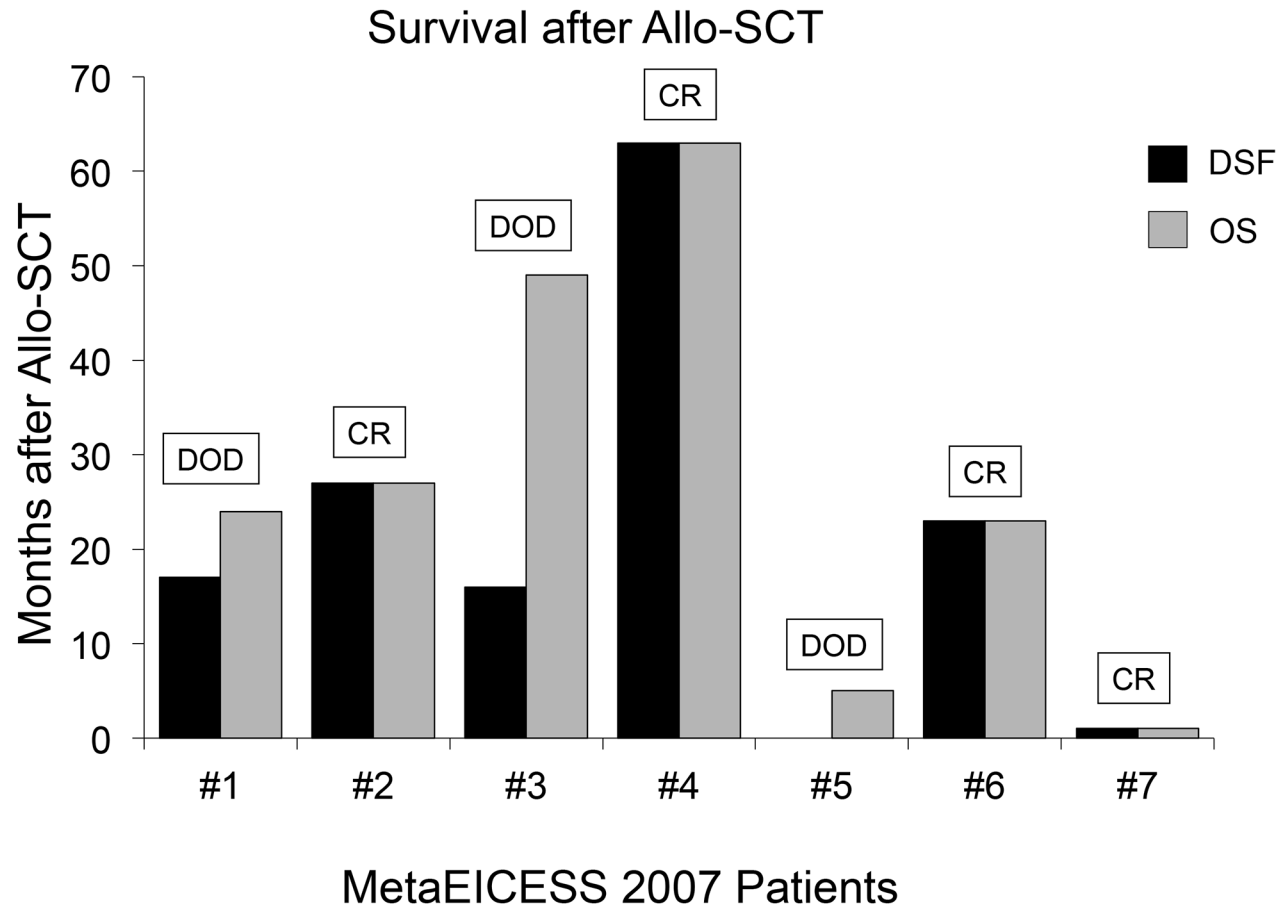

**Supplementary Figure S1: Individual survival after allogeneic stem cell transplantation.** Abbreviations: allogeneic stem cell transplantation, allogeneic stem cell transplantation; DOD, death of disease; CR complete remission; DFS, disease-free survival; OS, overall survival after allogeneic stem cell transplantation.

Supplementary Table S1: Individual patient characteristics and treatment.

See Supplementary File 1

Supplementary Table S2: Individual outcomes.

See Supplementary File 2

Supplementary Table S3: Multivariate analysis (only EICESS 1992; n=26); Confirmation of poor disease-free survival within EICESS 1992 patients with BM involvement at diagnosis (p=0.03 \*Wald-Test)

|                                    |                             | HR            | SE               | 95% CI       | *P-value     |
|------------------------------------|-----------------------------|---------------|------------------|--------------|--------------|
| Disease-free Survival (EICESS1992) | Age at Diagnosis            | 0.97          | 0.03             | 0.97 to 1.10 | <b>0.37</b>  |
|                                    | Gender                      | <i>male</i>   | <i>Reference</i> |              | <b>0.06</b>  |
|                                    |                             | <i>female</i> | 1.94             | 0.38         | 0.98 to 4.36 |
|                                    | BM Involvement at Diagnosis | <i>Yes</i>    | <i>Reference</i> |              | <b>0.03</b>  |
|                                    |                             | <i>No</i>     | 0.38             | 0.44         | 1.10 to 6.18 |

Abbreviations: BM, bone marrow; HR, Hazard Ratio; SE, Standard Error; CI, Confidence Interval.
